# Supplementary material for: Efficacy Confirmation Test of Immature Asian Pear (Pyrus pyrifolia Nakai) Extract on Ovalbumin-Induced Asthma in Mice
Source: MDPI journal article supplement (doi:10.3390/app13169342), 2023-08-17
Supplement: s1 [file s1]

Supplementary file

# Efficacy Confirmation Test of Immature Asian Pear (*Pyrus pyrifolia* Nakai) Extract on Ovalbumin-Induced Asthma in Mice

Mi Ran Kim <sup>1,†</sup>, Khawaja Muhammad Imran Bashir <sup>2,†</sup>, Jin-Hwa Lee <sup>1</sup>, Mo-Un Ku <sup>3</sup>, Joo Wan Kim <sup>4</sup>, Ki-Young Kim <sup>5</sup>, Su Shin <sup>5</sup>, Eun-Jin Hong <sup>5</sup>, Sae-Kwang Ku <sup>6,\*</sup>, and Jae-Suk Choi <sup>1,\*</sup>

<sup>1</sup> Department of Seafood Science and Technology, The Institute of Marine Industry, Gyeongsang National University, Tongyeong 53064, Republic of Korea; 210217@gnu.ac.kr (M.R.K.); evolution\_5237@naver.com (J.-H.L.)

<sup>2</sup> German Engineering Research Center for Life Science Technologies in Medicine and Environment, Busan 46742, Republic of Korea; imran.bashir@lstme.org

<sup>3</sup> Department of Biomedical Laboratory Science, College of Health and Welfare, Kyungwoon University, Gumi 39160, Republic of Korea; 202121018@ikw.ac.kr

<sup>4</sup> Department of Companion Animal Health, Daegu Haany University, Gyeongsan 38610, Republic of Korea; dvm\_jkkm@dhu.ac.kr

<sup>5</sup> Research Institute, BIO PORT KOREA INC., Busan 46034, Republic of Korea; kyk1967@bioportkorea.com (K.-Y.K.); sshin@bioportkorea.com (S.S.); ejhong@bioportkorea.com (E.-J.H.)

<sup>6</sup> Department of Anatomy and Histology, College of Korean Medicine, Daegu Haany University, Gyeongsan 38610, Republic of Korea

\* Correspondence: gucci200@dhu.ac.kr (S.-K.K.); jsc1008@gnu.ac.kr (J.-S.C.); +82-53-819-1549 (S.-K.K.); +82-55-772-9142 (J.-S.C.)

† These authors contributed equally to this work.

**Citation:** Kim, M.R.; Bashir, K.M.I.; Lee, J.-H.; Ku, M.-U.; Kim, J.W.; Kim, K.-Y.; Shin, S.; Hong, E.-J.; Ku, S.-K.; Choi, J.-S. Efficacy Confirmation Test of Immature Asian Pear (*Pyrus pyrifolia* Nakai) Extract on Ovalbumin-Induced Asthma in Mice. *Appl. Sci.* **2023**, *13*, x. <https://doi.org/10.3390/xxxxx>.

Academic Editor(s): Name

Received: 31 May 2023

Revised: 11 August 2023

Accepted: 14 August 2023

Published: date

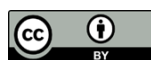

**Copyright:** © 2023 by the authors. Submitted for possible open access publication under the terms and conditions of the Creative Commons Attribution (CC BY) license (<https://creativecommons.org/licenses/by/4.0/>).

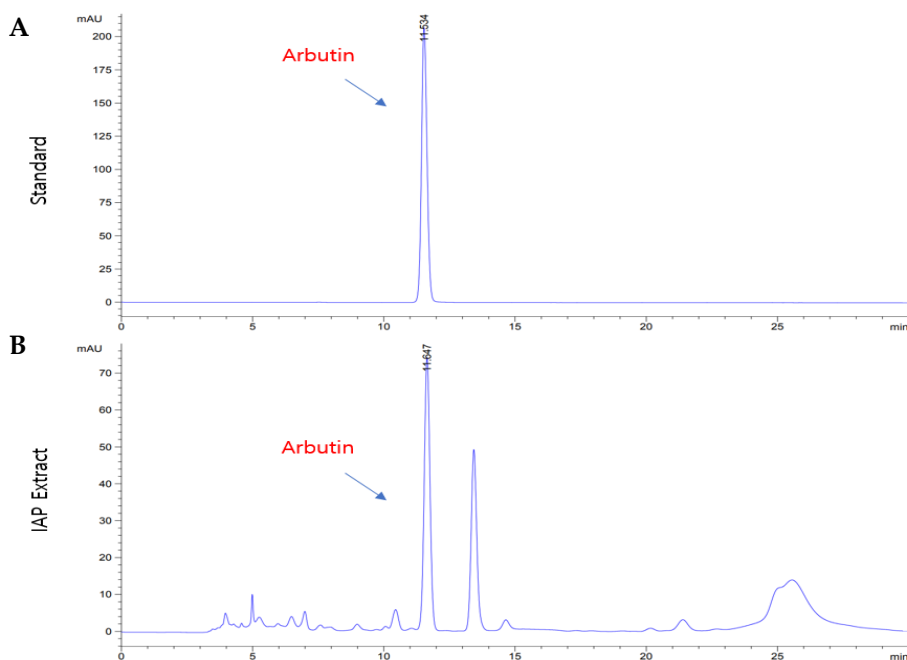

**Figure S1.** HPLC analysis of standard arbutin (A) and arbutin in the IAP extract (B).

**Table S1.** Oligonucleotides used for quantitative RT-PCR analysis.

| Target   | 5' – 3'   | Sequence                 | GenBank Accession Number |
|----------|-----------|--------------------------|--------------------------|
| NF-κB    | Sense     | GCTGCCAAAGAAGGACACGACA   | NM_008689                |
|          | Antisense | GGCAGGCTATTGCTCATCACAG   |                          |
| PTEN     | Sense     | TGAGTTCCTCAGCCATTGCCT    | NM_008960                |
|          | Antisense | GAGGTTTCCTCTGGTCCTGGTA   |                          |
| p38 MAPK | Sense     | CCGAACGATACCAGAACCTGTC   | NM_011951                |
|          | Antisense | ACGCAACTCTCGGTAGGTCCTT   |                          |
| PI3K     | Sense     | ACCATCAGTGGCTCTGCGGTTT   | NM_008840                |
|          | Antisense | GTGGTCTTCTGGGAACCTCACCT  |                          |
| Akt      | Sense     | GGACTACTTGCCTCCGAGAAG    | NM_009652                |
|          | Antisense | CATAGTGGCACCCTCCTTGATC   |                          |
| IL-4     | Sense     | ATCATCGGCATTTTGAACGAGGTC | NM_021283                |
|          | Antisense | ACCTTGGAAGCCCTACAGACGA   |                          |
| IL-5     | Sense     | GATGAGGCTTCCTGTCCCTACT   | NM_010558                |
|          | Antisense | TGACAGGTTTGGGAATAGCATTTC |                          |
| β-actin  | Sense     | CATTGCTGACAGGATGCAGAAGG  | NM_007393                |
|          | Antisense | TGCTGGAAGGTGGACAGTGAGG   |                          |

RT-PCR: Reverse transcription polymerase chain reaction; NF-κB: Nuclear factor kappa-light-chain-enhancer of activated B cells; PTEN: Phosphatase and TENsin homolog deleted on chromosome 10; MAPK: Mitogen-activated protein kinases; PI3K: Phosphoinositide 3-kinase; Akt: Protein kinase B; IL: Interleukin.

**Table S2.** Body weight gains in intact or OVA-induced allergic asthma mice.

| Groups               | Body weights at                          |                                   |                                                   | Body weight gains [B-A]  |
|----------------------|------------------------------------------|-----------------------------------|---------------------------------------------------|--------------------------|
|                      | Initial test article administration [A]* | Last test material administration | 24 h after last test material administration [B]* |                          |
| Controls             |                                          |                                   |                                                   |                          |
| Intact vehicle       | 14.56 ± 0.57                             | 18.68 ± 0.31                      | 16.52 ± 0.49                                      | 1.96 ± 0.64              |
| OVA                  | 14.55 ± 0.74                             | 18.85 ± 0.59                      | 16.63 ± 0.29                                      | 2.08 ± 0.55              |
| Reference            |                                          |                                   |                                                   |                          |
| DEXA                 | 14.40 ± 0.61                             | 17.41 ± 0.58 <sup>ab</sup>        | 15.54 ± 0.47 <sup>de</sup>                        | 1.14 ± 0.55 <sup>c</sup> |
| Test material groups |                                          |                                   |                                                   |                          |
| IAP <sub>400</sub>   | 14.30 ± 0.59                             | 18.67 ± 0.89                      | 16.55 ± 0.96                                      | 2.25 ± 0.88              |
| IAP <sub>200</sub>   | 14.46 ± 0.64                             | 18.64 ± 0.44                      | 16.55 ± 0.33                                      | 2.09 ± 0.62              |
| IAP <sub>100</sub>   | 14.29 ± 0.37                             | 18.48 ± 0.44                      | 16.39 ± 0.47                                      | 2.10 ± 0.63              |

\* All animals were fasted overnight; <sup>a</sup>*p* < 0.01 as compared with intact vehicle control by THSD test; <sup>b</sup>*p* < 0.01 and <sup>c</sup>*p* < 0.05 as compared with OVA control by THSD test; <sup>d</sup>*p* < 0.01 as compared with intact vehicle control by DT3 test; <sup>e</sup>*p* < 0.01 as compared with OVA control by DT3 test.

**Table S3.** Lung weight and gross inspection in intact or OVA-induced allergic asthma mice.

| Groups               | Lung weights                |                             | Congestional regions (%) – gross findings |
|----------------------|-----------------------------|-----------------------------|-------------------------------------------|
|                      | Absolute (g)                | Relative (%)                |                                           |
| Controls             |                             |                             |                                           |
| Intact vehicle       | 0.114 ± 0.005               | 0.693 ± 0.038               | 2.50 ± 1.53                               |
| OVA                  | 0.168 ± 0.011 <sup>a</sup>  | 1.013 ± 0.085 <sup>a</sup>  | 47.47 ± 10.21 <sup>d</sup>                |
| Reference            |                             |                             |                                           |
| DEXA                 | 0.122 ± 0.009 <sup>c</sup>  | 0.784 ± 0.069 <sup>ac</sup> | 8.40 ± 2.24 <sup>de</sup>                 |
| Test material groups |                             |                             |                                           |
| IAP <sub>400</sub>   | 0.127 ± 0.008 <sup>ac</sup> | 0.771 ± 0.060 <sup>bc</sup> | 8.73 ± 2.88 <sup>de</sup>                 |
| IAP <sub>200</sub>   | 0.139 ± 0.006 <sup>ac</sup> | 0.840 ± 0.041 <sup>ac</sup> | 18.81 ± 5.35 <sup>de</sup>                |
| IAP <sub>100</sub>   | 0.147 ± 0.005 <sup>ac</sup> | 0.895 ± 0.031 <sup>ac</sup> | 25.96 ± 5.98 <sup>de</sup>                |

<sup>a</sup>*p* < 0.01 and <sup>b</sup>*p* < 0.05 as compared with intact vehicle control by THSD test; <sup>c</sup>*p* < 0.01 as compared with OVA control by THSD test; <sup>d</sup>*p* < 0.01 as compared with intact vehicle control by DT3 test; <sup>e</sup>*p* < 0.01 as compared with OVA control by DT3 test.
